# Supplementary material for: Evaluation of a new high-throughput method for identifying quorum quenching bacteria
Source: PubMed Central journal article supplement — Sci Rep. 2013 Oct 14;3:2935. doi: 10.1038/srep02935 (PMC3796309; doi:10.1038/srep02935), 2013-10-14
Supplement: srep02935-s1.pdf [file srep02935-s1.pdf]

**Evaluation of a new high-throughput method for identifying quorum quenching  
bacteria**

Kaihao Tang, Yunhui Zhang, Min Yu, Xiaochong Shi, Tom Coenye, Peter Bossier  
and Xiao-Hua Zhang

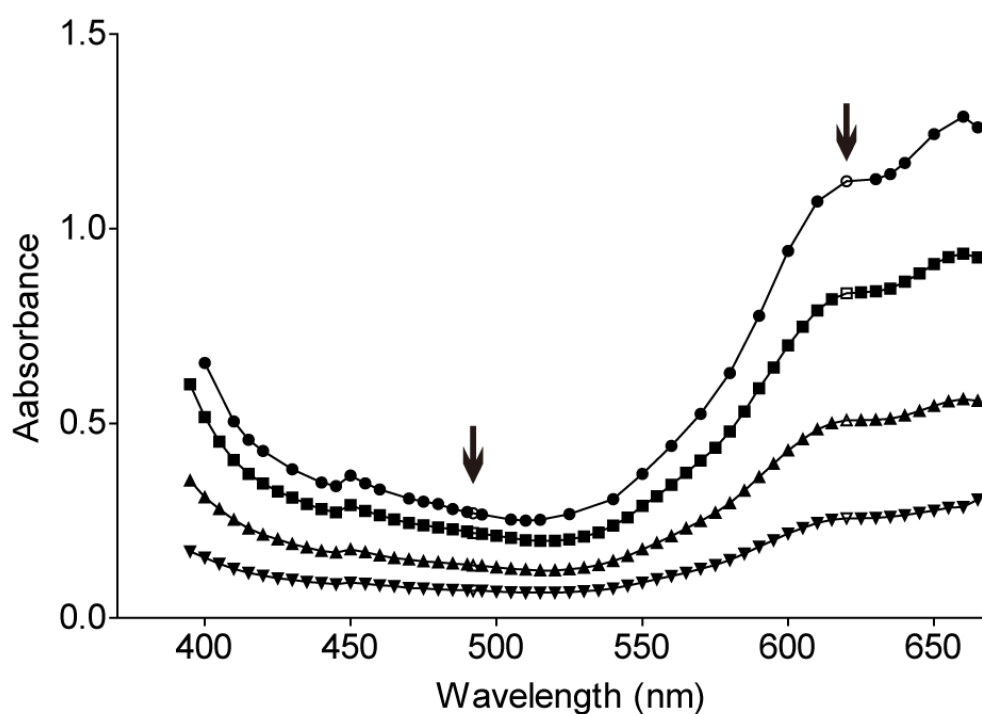

**Supplementary Figure S1. The absorbance spectra of indigo in AT minimal glucose medium between 380 and 660 nm. Four different concentrations of 5, 5'-dibromo-4, 4'-dichloro-indigo in AT minimal glucose medium were measured the absorbance at a wide range of wavelengths. Arrows showed relatively lower and higher absorbance at the wavelengths 492 nm and 630 nm respectively.**

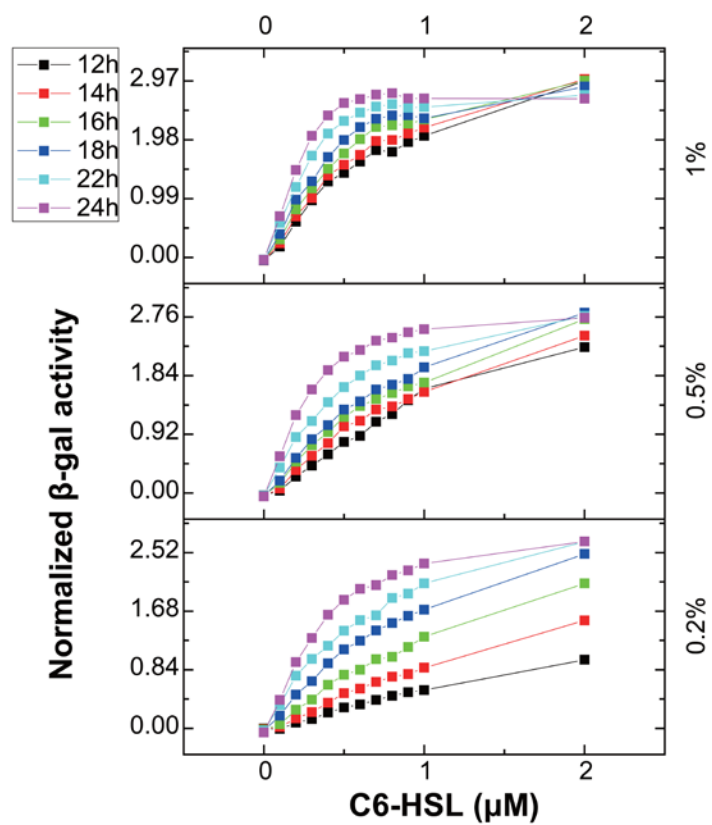

**Supplementary Figure S2. The relationships among inoculation amount, assay time, the concentration of C6-HSL and the normalized  $\beta$ -galactosidase.**

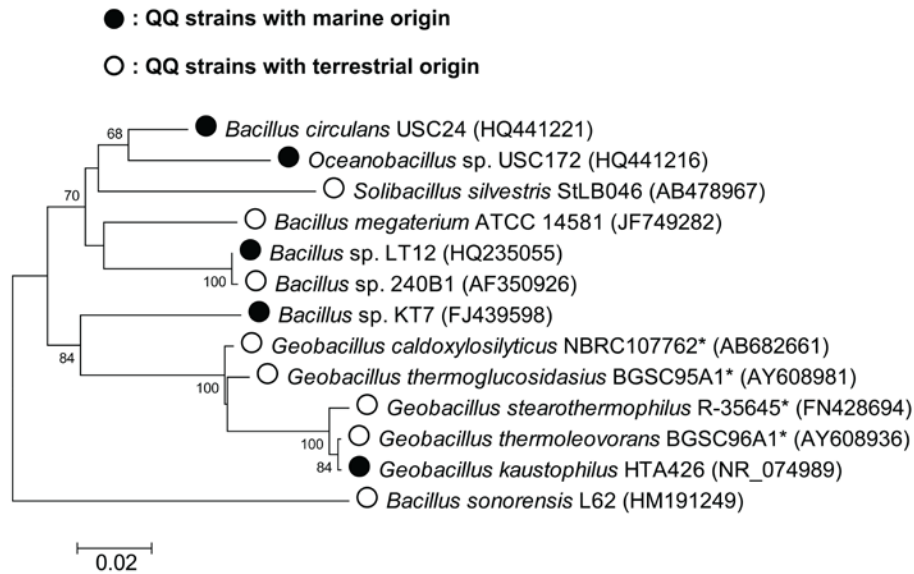

**Supplementary Figure S3. The neighbour-joining tree of *Bacillaceae* branch.** The number after each strain is the accession number in NCBI database. Bootstrap coefficients below 50% were not shown. Scale bar, 0.02 substitutions per nucleotide position.

\*The sequences of 16S rRNA genes of *Geobacillus caldxylosilyticus* YS-8, *Geobacillus thermoglucosidasius* KCCM 41418, *Geobacillus stearothermophilus* YS-9 and *Geobacillus thermoleovorans* YS-1<sup>1</sup> were not available, therefore those of *G. caldxylosilyticus* NBRC1007762, *G. thermoglucosidasius* BGSC95A1, *G. stearothermophilus* R-35646 and *G. thermoleovorans* BGSC96A were used instead.

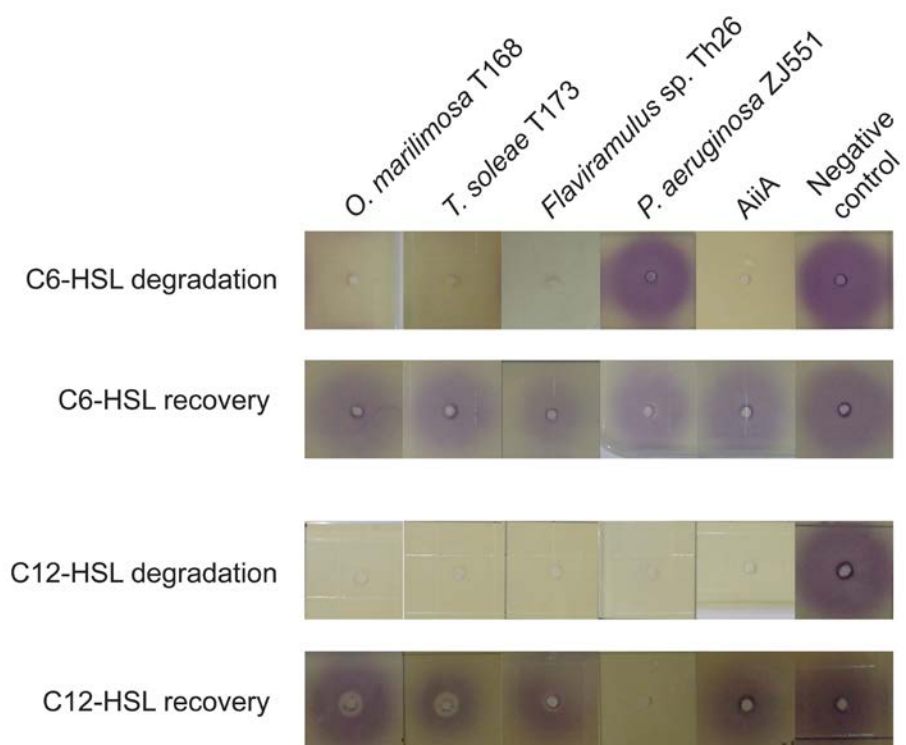

**Supplementary Figure S4. C6-HSL and C12-HSL degradation and recovery by acidification.** The recovery of AHLs was performed after C6-HSLs were co-incubated with bacterial cultures for 24 hours and 2 hours for C12-HSL.

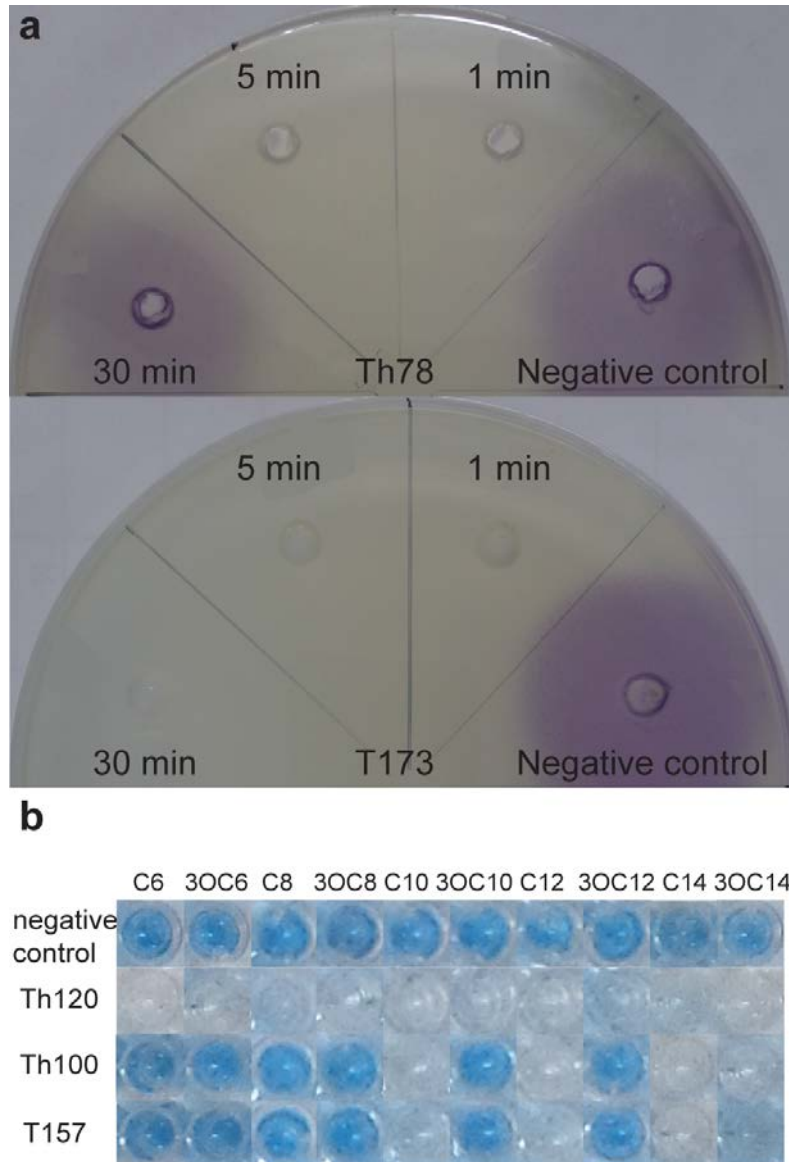

**Supplementary Figure S5. QQ activities of some representative bacterial strains.**

**a**, The heat-resistance of C6-HSL degrading activities of strains Th78 and T173. The bacterial cultures were boiled for 1-30 min before reaction step and the remaining levels of C6-HSL were measured by the CV026 plate assay. **b**, The substrate specificity of four strains measured by the A136 liquid X-gal assay (Th100, 100% similarity to *Pseudoalteromonas paragorgicola* KMM 3548<sup>T</sup>; T157, 100% similarity to *Zobellia russellii* KMM 3677<sup>T</sup>).

## Reference

1. Seo, M. J., Lee, B. S., Pyun, Y. R. & Park, H. Isolation and characterization of *N*-acylhomoserine lactonase from the thermophilic bacterium, *Geobacillus caldxylosilyticus* YS-8. *Biosci. Biotechnol. Biochem.* **75**, 1789-1795 (2011).
